# Supplementary material for: The Photosynthetic Apparatus and Its Regulation in the Aerobic Gammaproteobacterium Congregibacter litoralis gen. nov., sp. nov
Source: PLOS journal article supplement (doi:10.1371/journal.pone.0004866), 2009-03-13

Figure S1.

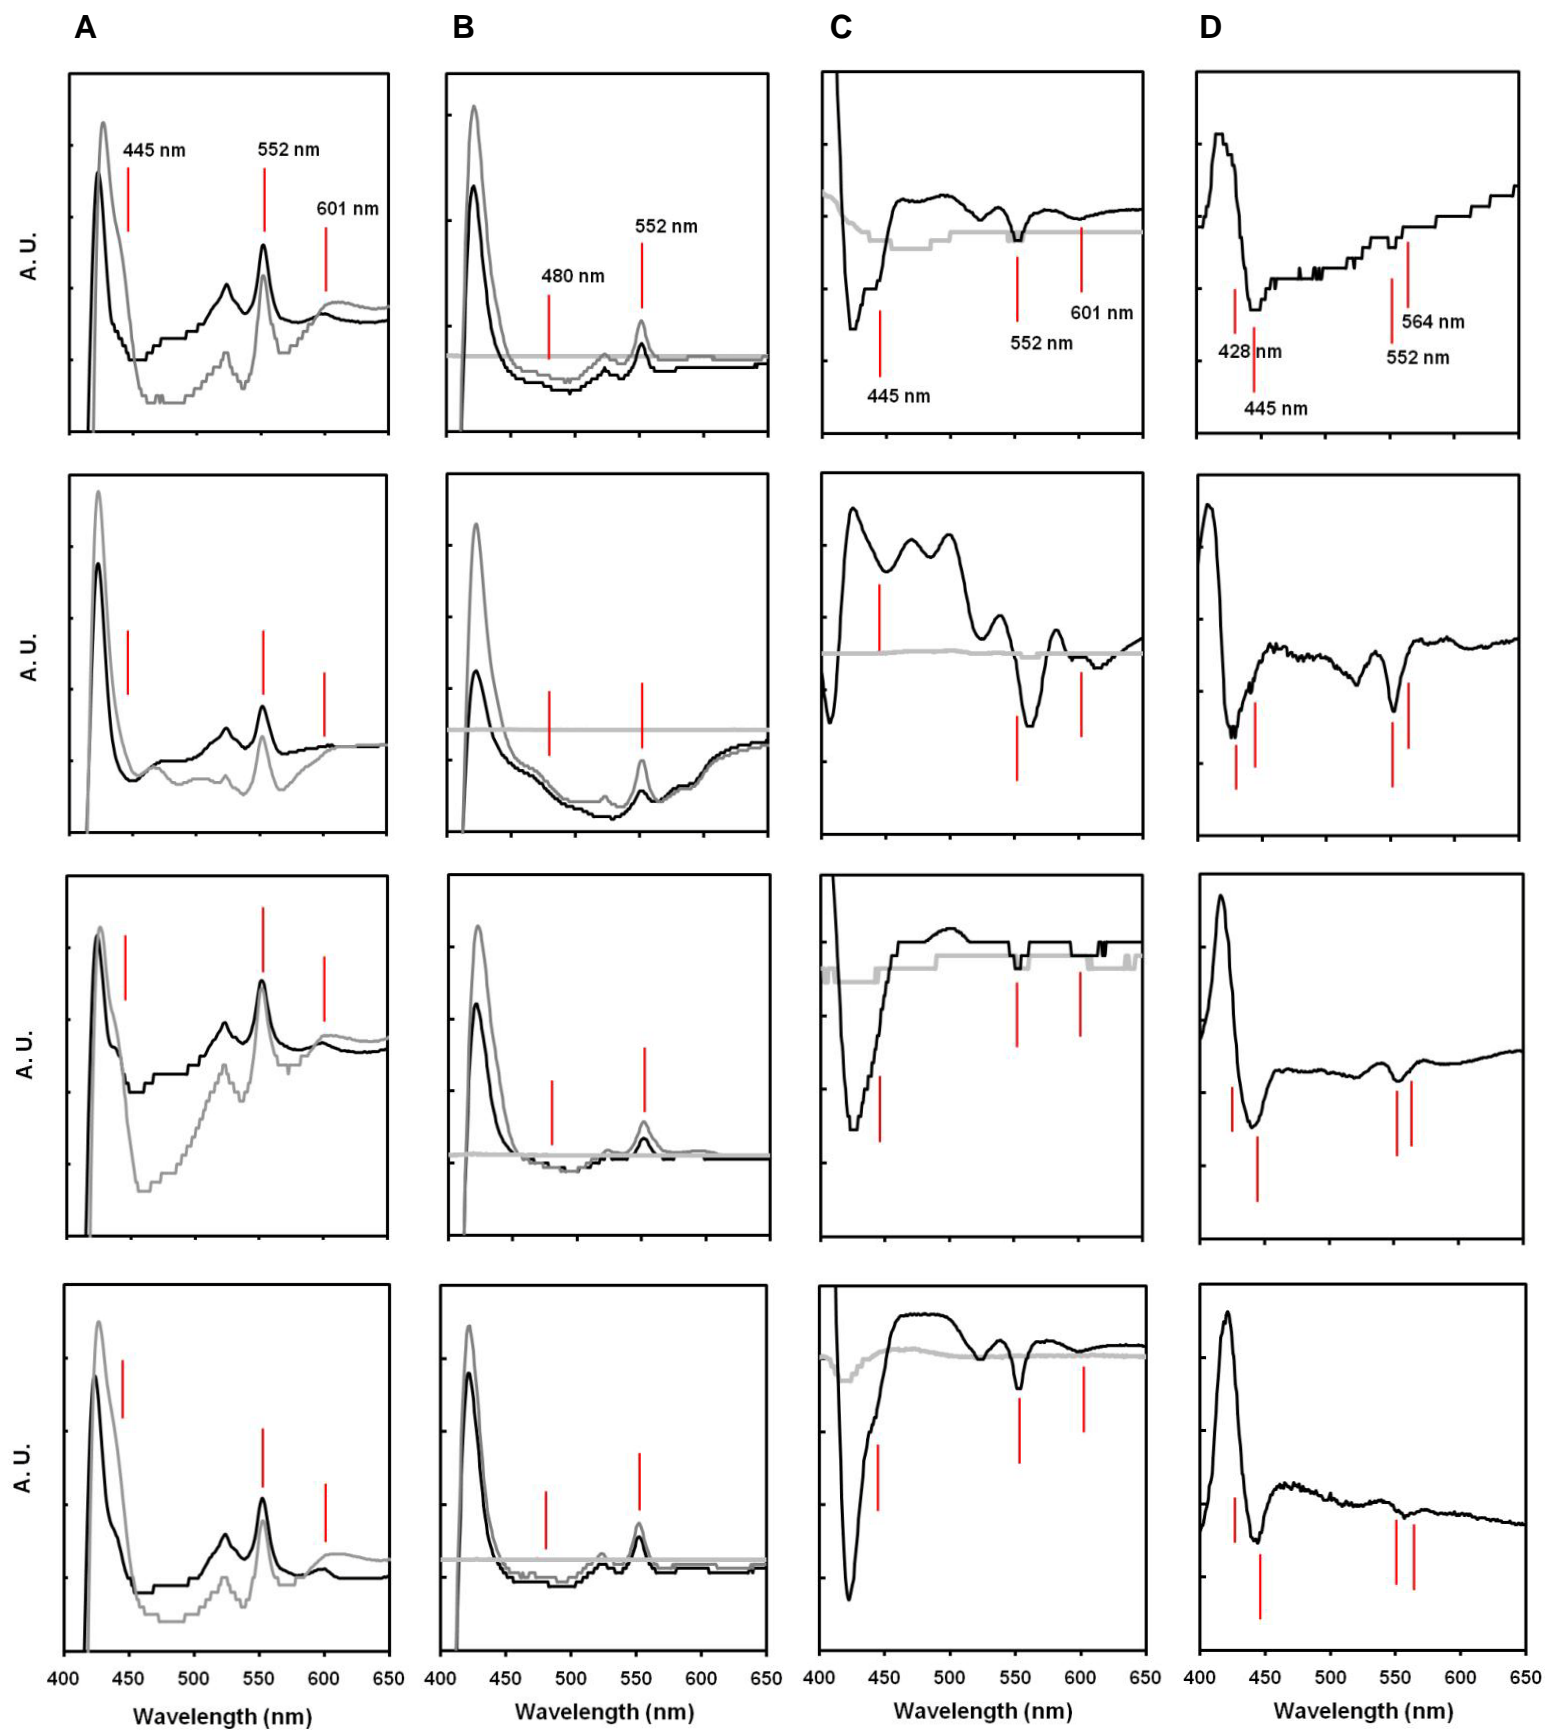

Supplement: S3 (10.1371/journal.pone.0004866.s003) [file journal.pone.0004866.s003]
